# Supplementary material
Source: Research Square preprint supplement (doi:10.21203/rs.3.rs-9397165/v1)
Supplement: Supplementary file 1 [file 869cf66070ca6f24cefe5780.docx]

**Supplementary Information**


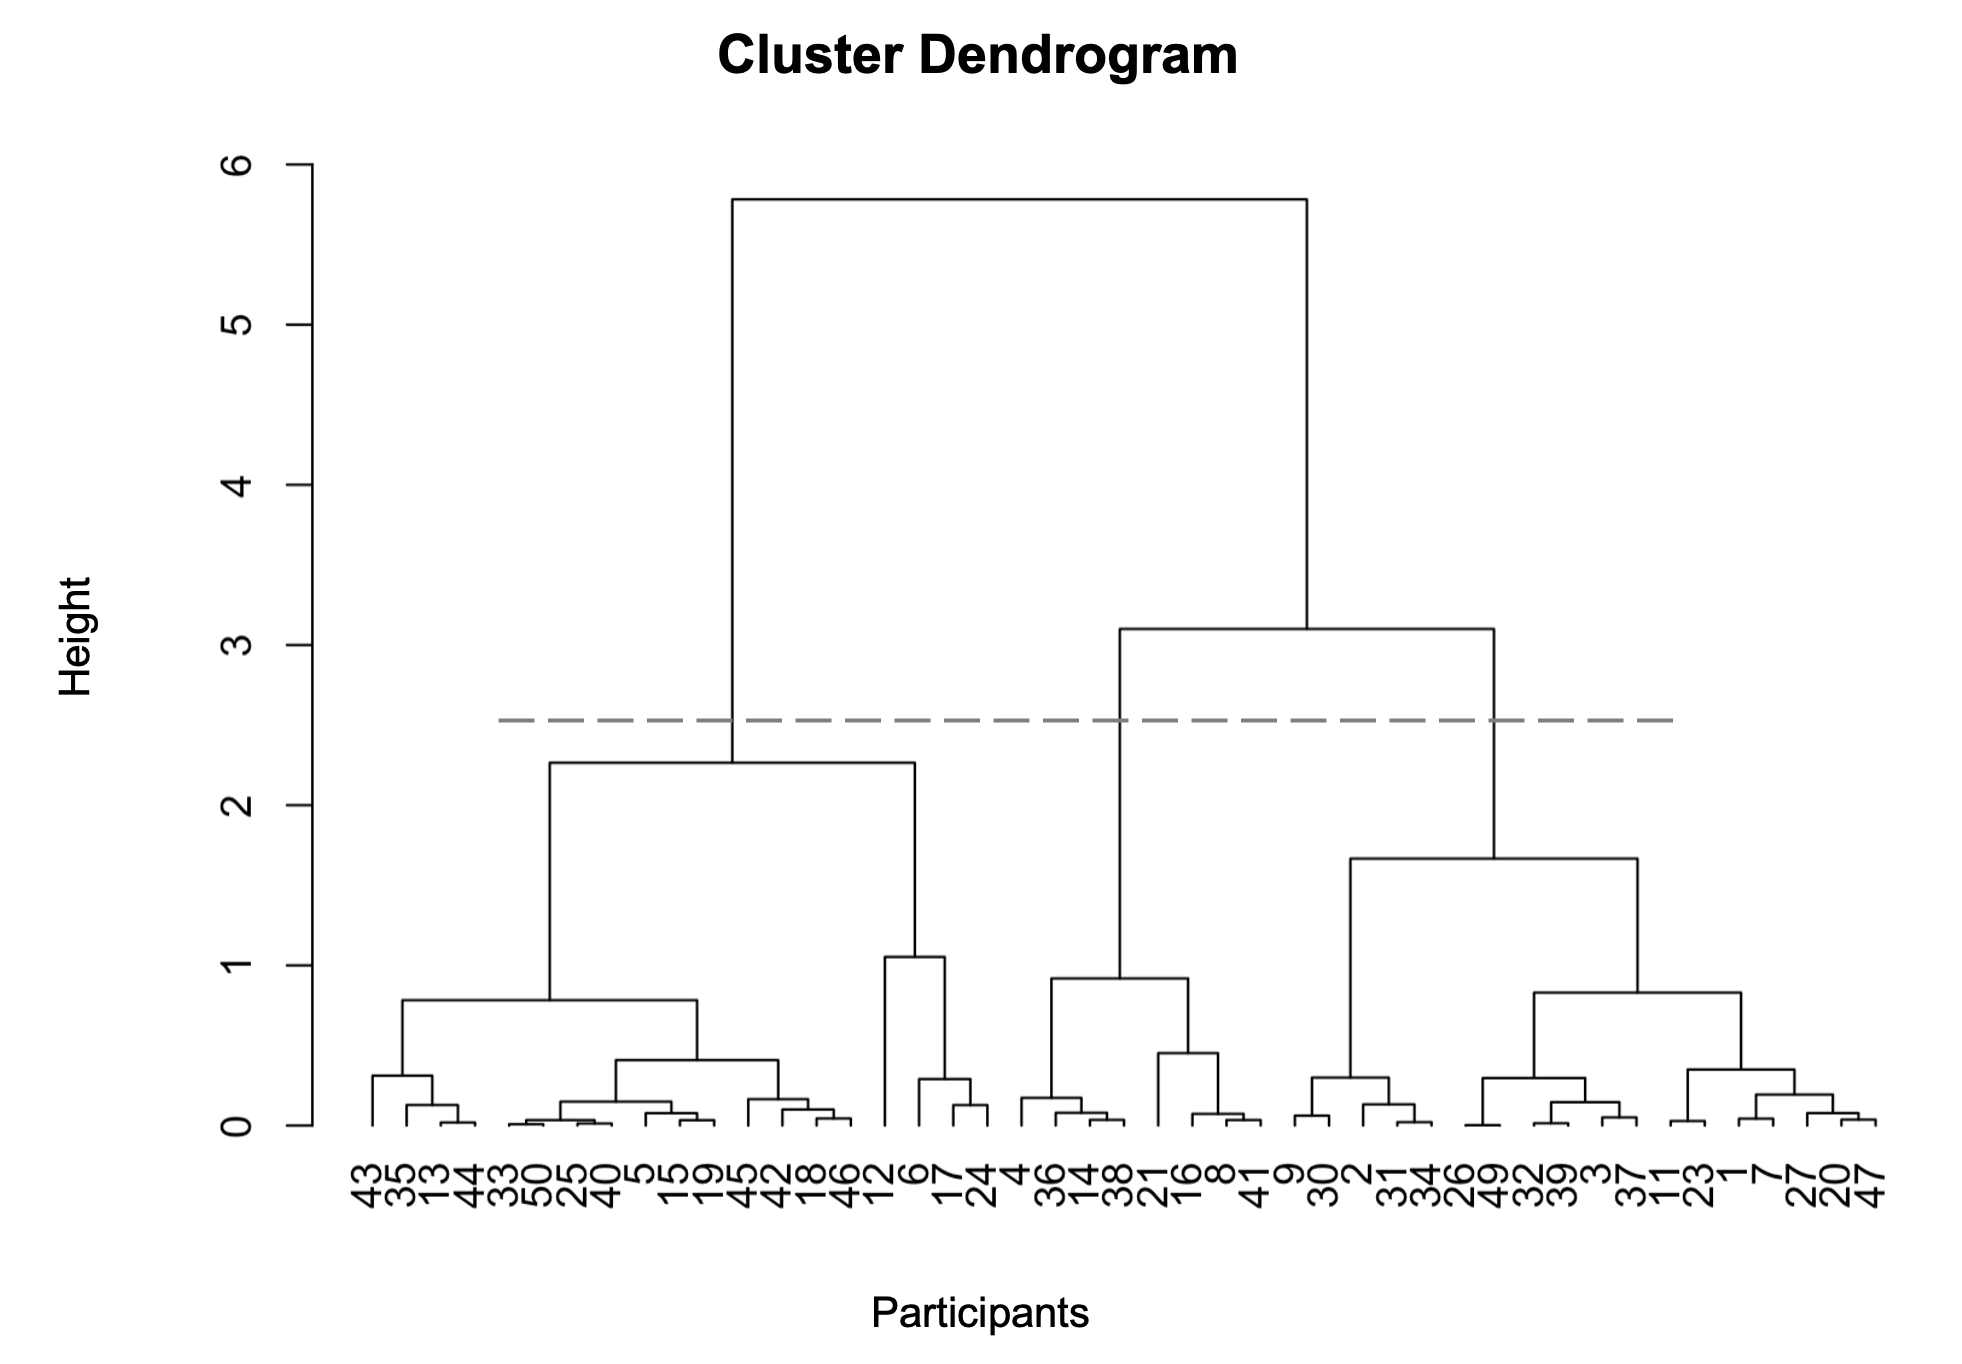


**Supplementary Figure 1.** Cluster dendrogram illustrating the results of the hierarchical clustering analysis. Dashed line indicates the threshold for three clusters.


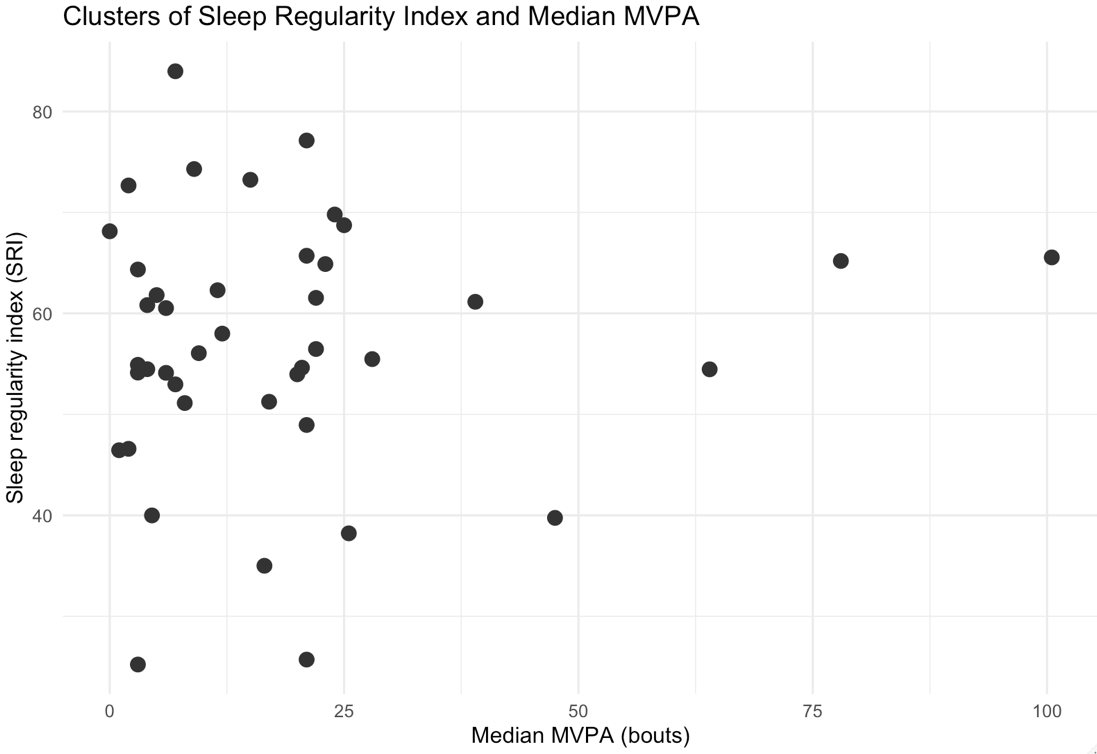


**Supplementary Figure 2.** Shows the cluster analysis of MVPA compared to SB.

MVPA: moderate to vigorous physical activity in bouts
